# Supplementary material
Source: publisher figshare collection journal article supplement (https://acs.figshare.com/ndownloader/files/4393189)
Supplement: Supplementary file 1 [file 4393189]

## SUPPORTING INFORMATION PARAGRAPH

**Calculation of interfacial energy**

The rudimentary relationship between  $\gamma_{\text{sub/ZnO}}$  (the interfacial energy between a ZnO nucleus and the SAM-treated substrate) and  $\gamma_{\text{sub}}$  (the total surface energy of the SAM-treated substrate) can be estimated by using a theoretical model suggested by Wu.<sup>19</sup>

$$\gamma_{\text{sub/ZnO}} = \gamma_{\text{sub}} + \gamma_{\text{ZnO}} - 4(\gamma_{\text{sub}}^{\text{d}} \gamma_{\text{ZnO}}^{\text{d}}) / (\gamma_{\text{sub}}^{\text{d}} + \gamma_{\text{ZnO}}^{\text{d}}) - 4(\gamma_{\text{sub}}^{\text{p}} \gamma_{\text{ZnO}}^{\text{p}}) / (\gamma_{\text{sub}}^{\text{p}} + \gamma_{\text{ZnO}}^{\text{p}}),$$

where  $\gamma_{\text{ZnO}}$  is the surface energy of a ZnO nucleus and the indices d and p refer respectively to the dispersive and polar components.  $\gamma_{\text{ZnO}}$  was assumed to be identical to the surface energy of the bare ZnO seed layer. Based on the measurement in Table 1,  $\gamma_{\text{sub/ZnO}}$  is shown as a function of  $\gamma_{\text{sub}}$  in Figure S1. The estimated interfacial energy  $\gamma_{\text{sub/ZnO}}$  would decrease as  $\gamma_{\text{sub}}$  increases. Hence, until a minimum surface energy is exceeded (i.e.,  $\gamma_{\text{sub/ZnO}}$  becomes less than  $\gamma_{\text{liq/ZnO}}$ ), heterogeneous nucleation on the treated substrates is expected to be suppressed.

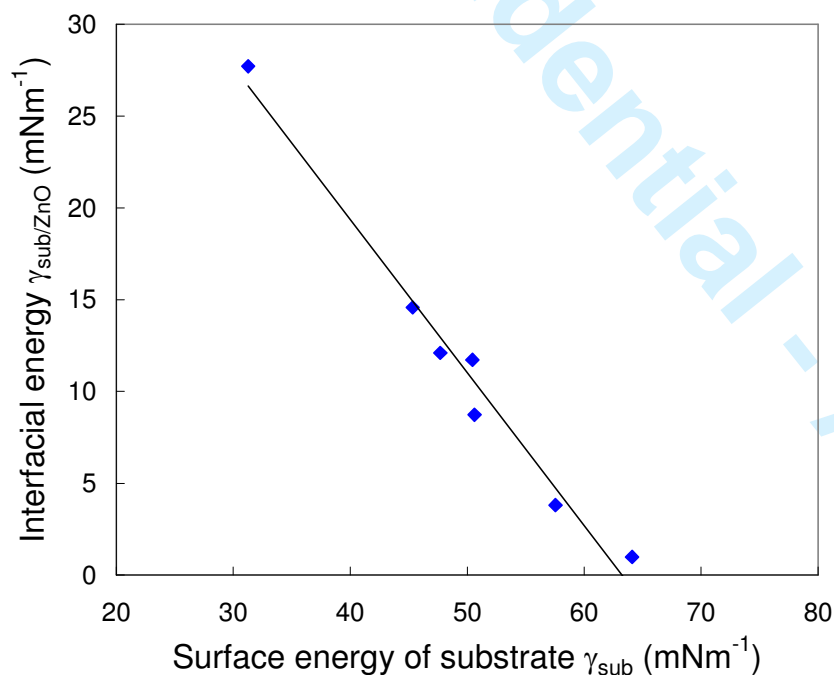

**Figure S1** Interfacial energy between a ZnO nucleus and the mixed SAM-treated ZnO substrate, as a function of the surface energy of the mixed SAM treated ZnO substrate.
